1  
2  
3  
4  
5  
6  
7  
8  
9  
10  
11  
12  
13  
14  
15  
16  
17

# **Filter paper-based spin column for low throughput nucleic acid purification**

**Rui Shi<sup>1,2</sup>, Ramsey S. Lewis<sup>2</sup>, Dilip R. Panthee<sup>1\*</sup>**

1. Department of Horticultural Science, North Carolina State University, Mountain Horticultural Crops Research & Extension Center, 455 Research Drive, Mills River, NC 28759, USA.

2. Department of Crop and Soil Science, North Carolina State University, Raleigh, NC 27695-7620, USA.

\*Corresponding author

E-mail: [dilip\\_panthee@ncsu.edu](mailto:dilip_panthee@ncsu.edu)

## 18 **Abstract**

19 We describe a method of recharging used spin column or assembling homemade spin column  
20 using filter paper as binding material for low throughput nucleic acid purification. We evaluated  
21 the efficiency of filter paper based spin columns in the purification of different type of nucleic  
22 acids. For instance, by following protocols of respective commercial kits, we found that filter  
23 paper to be a useful binding material for purification of many types of nucleic acids, including  
24 plant genomic DNA, plant total RNA, PCR product, and DNA from agarose gels. We also found  
25 that filter paper has a weak binding affinity to plasmid DNA in tested miniprep protocols. Also,  
26 we present the protocols of using filter paper recharged spin column or homemade spin column  
27 for low throughput purification of plant genomic DNA and plant total RNA with commercial kit  
28 buffer leftover and less expensive homemade buffer.

29

## 30 **Introduction**

31 As a basic molecular biology technique, nucleic acid purification is the starting point for many  
32 molecular biology applications [1, 2]. Classic nucleic acid purification methods are based on  
33 organic extraction followed by ethanol-based precipitation. However, classic methods are time-  
34 consuming and require the use of toxic solvents, such as chloroform and phenol which can be  
35 harmful to the user and the environment [1, 2].

36 Commercial kits usually follow solid-phase purification approaches whereby nucleic acids in  
37 an extraction solution are absorbed by a solid-phase binding material under appropriate  
38 chaotropic conditions, followed by washing of non-nucleic acids remaining on the binding  
39 material using appropriate buffer solutions, and elution of purified nucleic acids from the binding

40 material using low salt solutions [1, 3, 4]. Commercial kits using this approach permit for fast  
41 purification of high-quality nucleic acids, although they are expensive to use.

42 The success of commercial kits largely relies on the spin columns or spin plates assembled  
43 with solid-phase nucleic acid binding material which allow easy binding, washing, and elution of  
44 nucleic acids in the purification process. The most widely adopted nucleic acid binding material  
45 in the past has been mineral based silica material in the form of a matrix (glass fiber filter or  
46 silica membrane) or powder (glass milk or silica slurry). Guanidine based buffer is usually  
47 adopted to provide a chaotropic condition for nucleic acid binding [1]. Plant-based cellulose  
48 material has been applied in DNA and RNA purification. For example, Su and Comeau [5]  
49 adopted cellulose fiber to purify nucleic acids by using sodium chloride and polyethylene glycol  
50 as binding reagents. MeganCel paramagnetic cellulose particles are an example of a  
51 commercialized product from Promega [6]. Also, modified cellulose such as DEAE-modified  
52 cellulose membranes can be applied as anion exchange materials for nucleic acid purification [7].  
53 In a previous report, we found that filter paper made from cellulose fiber to be a viable  
54 replacement for silicon-based material for purification of plant genomic DNA from CTAB/NaCl  
55 extractions [8]. Another recent report also indicated that the filter paper tip could be used to  
56 purify nucleic acids from crude extract with NaCl in a concise time for subsequent PCR based  
57 analyses [9]. Since cellulose-based filter paper is an inexpensive and readily available material in  
58 laboratories, we hypothesized that filter paper might have more widespread usefulness in solid-  
59 phase based nucleic acid purification. We, therefore, described our attempts to use filter paper in  
60 assembling recharged or homemade spin column suitable for low throughput nucleic acids  
61 purification.

62

## 63 **Material and methods**

### 64 **Plant materials, plasmid DNA and PCR product**

65 Tomato (*Solanum lycopersicum L.*) plant samples were collected from the field or greenhouse of  
66 Mountain Horticultural Crops Research & Extension Center of North Carolina State University  
67 at Mills River, NC. USA. Tobacco (*Nicotiana tabacum L.*) plant samples were collected from  
68 laboratory or growth chamber experiments being carried out by the Department of Crop and Soil  
69 Science at North Carolina State University, Raleigh. For DNA purification, collected fresh  
70 samples can be used immediately, or stored at -20°C before use. Usually, about 50 to 100 mg leaf  
71 samples were collected and put into 2 ml screw cap tubes for grinding using mechanic  
72 homogenizer, or 1.5 ml Eppendorf tube for grinding using plastic pellet pestles. The sample for  
73 RNA purification should be frozen in liquid nitrogen quickly after collection and grind into fine  
74 powder in liquid nitrogen, then transfer 50 to 100 mg ground sample into the tube and to use  
75 immediately or store at -80°C before use.

76 pUC19 and pBI121 plasmids were purchased from Invitrogen (Carlsbad, CA). The GUS gene  
77 fragment was amplified from the pBI121 plasmid or transgenic tobacco by PCR using the  
78 following primer:

79 The forward primer, 5'- TGACCTCGAGGTCGACGATATCGTCGTCATGAAGATGCGGAC-  
80 3'

81 Reverse primer, 5'- CTAGACTAGTCCCGGGGGTACCATCCACGCCGTATTCGGTG-3'.

82

### 83 **Filter paper-based spin column preparation**

84 Recharging of used commercial spin columns is initiated by separating plastic parts and treating  
85 them with 10% bleach for at least 10 mins, followed by thorough rinsing with sterilized water  
86 several times, and air-drying. Filter paper discs were punched from sheet of Whatman™  
87 qualitative filter paper, Grade 3 (GE Healthcare Life Science, UK) or equivalent filter paper  
88 using 3/16-inch (~8mm) paper puncher, and then one or two layers of filter paper disc is added to  
89 the column by pushing down them to bottom of column tightly using the end of a 200 µl pipette  
90 tip (Fig 1A). The assembled spin column could be autoclaved and air dried.

91

92 **Fig 1. Illustration of recharging spin column and homemade spin column using filter**  
93 **paper.** (A) Recharged used spin column with a flat bottom and net structure to support filter  
94 paper discs. (B) Homemade filter paper-based spin column prepared by using 0.5 ml tube with  
95 the bottom part cut, and adding the top part of 10 µl pipette tip as supporting tube to support two  
96 layers of filter paper discs loaded on it within the tube. The homemade spin column is based on  
97 0.5 ml PCR tubes. In brief, the bottom of 0.5 ml tubes is initially cut off, followed by the  
98 insertion of the upper part of 10 µl pipette tips to serve as supporting tubing, then load one or  
99 two layers of filter paper discs on the supporting ring in tube, and push tightly using upper end of  
100 10 µl tip (Fig 1B). For homemade spin column based on 0.5 ml PCR tube, filter paper discs were  
101 punched using a standard 1/4-inch (6.35 mm) paper puncher from filter paper sheet.

102

103 **Purify plant genomic DNA using filter paper-based spin**  
104 **column with Qiagen plant DNeasy kit buffer or homemade**  
105 **buffer**

106 This protocol is an example of using filter paper-based spin columns to purify plant genomic  
107 DNA with Qiagen DNeasy Plant mini kit buffers referred to Qiagen DNeasy® plant handbook  
108 (March 2018) or less expensive homemade buffer as described by Lemke et al [10].

109 To lysis plant material, add 400  $\mu$ l AP1 buffer of Qiagen kit or homemade lysis buffer (0.5%  
110 SDS, 8% PVP-10, 250 mM NaCl, 25 mM Na-DETA, 200 mM Tris-HCl pH7.5) along with 4  $\mu$ l  
111 RNase A stock solution (100 mg/ml, Qiagen) into 2 ml screw cap tube with 50 to 100 mg frozen  
112 or fresh plant material, then add two tungsten carbide beads (Qiagen) or similar beads into tube  
113 and homogenize samples using homogenization equipment like FastPrep FP120 cell  
114 homogenizer (Savant Instruments Inc, Holbrook, NY) followed the manual. Alternatively, grind  
115 50 to 100 mg frozen or fresh sample in 1.5 ml Eppendorf tube with 400  $\mu$ l lysis buffer and 4  $\mu$ l  
116 RNase A stock solution using disposable plastic pellet pestles (USA Scientific, Ocala, FL).

117 Tubes with lysis mixture are incubated at 65°C for 10 min (mix by inverting the tube 2 to 3  
118 times), then add 130  $\mu$ l P3 buffer of Qiagen kit or 130  $\mu$ l homemade precipitation buffer (5M  
119 KAc, pH 6.5) and maintenance on ice for at least 5 mins. Centrifuge sample tube using a  
120 microcentrifuge at its top speed ( $\geq 16,000$  g) for 10 mins to clear lysate.

121 In case lysate is not well cleared, an option step followed is to place a spin column with one  
122 layer of filter paper into a new 2 ml tube which is used as collection tube, then transfer lysate to  
123 the spin column and centrifuge at  $6,000 \times g$  for 1 min followed another round of centrifuge at top  
124 speed for 1 min to get cleared lysate in collection tube.

125 To bind DNA onto filter paper discs in spin column, transfer cleared lysate from collection  
126 tube into a new tube and mix with 1.5 volume of AW1 buffer of Qiagen kit or homemade  
127 binding buffer (2M Guanidine Hydrochloride, 75% ethanol) by pipetting or inversion, transfer  
128 mixture to new spin column assembled with two layers filter paper disc, which placed in a new

129 2-ml collection tube, centrifuge at  $6000 \times g$  for 1 min, discard flow through and repeat to load  
130 remaining solution for another round of centrifuge step to allow all cleared lysate flow through  
131 filter paper discs in spin column.

132 To wash filter paper discs in the spin column, add 500  $\mu$ l AW2 buffer of Qiagen kit or  
133 homemade washing buffer I (10 mM NaCl, 10 mM Tris-HCl pH6.5, 80% ethanol) to the column,  
134 spin at  $6000 \times g$  1 min, discard flow through and reuse collection tube. Add 500  $\mu$ l AW2 buffer  
135 of Qiagen kit or homemade washing buffer II (95% ethanol), spin at 6000 g for 1 min and then  
136 transfer spin column to the new collection tube. Centrifuge columns at the top speed for at least 2  
137 mins.

138 For DNA elution from filter paper discs, insert a spin column to new 1.5 ml collection tube, air  
139 dry for a while and add 100  $\mu$ l AE buffer of Qiagen kit or 10 mM Tris-HCl (pH8.5) on filter  
140 paper in spin column, and maintain at room temperature for 5 mins, then centrifuge at 6000 g for  
141 1 min to elute DNA into collection tube.

142

## 143 **Purification of plant RNA using filter paper-based spin** 144 **column with commercial kit buffer or homemade buffer**

145 This protocol is an example of using filter paper-based spin columns to purify plant total RNA  
146 with Qiagen RNeasy Plant mini kit buffers according to RNeasy® Mini Handbook (Fourth  
147 edition, June 2012) or less expensive homemade buffer presented by Yaffe et al [11].

148 In brief, add up to 100 mg grinded frozen sample into 1.5 or 2 ml tube, add 450  $\mu$ l buffer RTL  
149 or RLC of Qiagen kit with 1% (v/v) b-mercaptoethanol or homemade lysis buffer (8 M

150 guanidine hydrochloride, 20 mM MES hydrate and 20 mM EDTA) along with 1% (v/v) b-  
151 mercaptoethanol.

152 Tube with lysis mixture is incubated at 55°C for 1 to 3 min (mix by inverting the tube 2 to 3  
153 times), and then centrifuge tube using a microcentrifuge at top speed ( $\geq 16,000 \times g$ ) for 5 to 10  
154 mins to clear lysate. If lysate is not clear enough, then insert a spin column assembled with one  
155 layer of filter paper in a 2 ml new collection tube, and transfer all cleared lysate to spin column  
156 and centrifuge at  $8,000 \times g$  for 1 min followed another round of spin at top speed for 1 mins to  
157 get cleared lysate.

158 Transfer all cleared lysate to a new 1.5 ml tube and mix with half amount of ethanol by  
159 pipetting or inversion. Place a new spin column assembled with two layers of filter paper discs  
160 into a new 2 ml collection tube, then transfer lysate/ethanol mixture to spin column and  
161 centrifuge at  $8000 \times g$  for 1 min, discard flow through, and reuse collection tube and repeat to  
162 load remaining solution and centrifuge again.

163 To wash column, add 700  $\mu$ l RW1 buffer of Qiagen kit or homemade washing buffer I (3 M  
164 Na-acetate pH 5.2) to the spin column, then spin at  $6000 \times g$  1 min and discard flow through  
165 from collection tube. Add 500  $\mu$ l RPE buffer of Qiagen kit or homemade washing buffer II (70%  
166 ethanol), and centrifuge at  $8000 \times g$  for 1 min, transfer spin column to new collection tube and  
167 centrifuge spin column at the top speed for at least 2 mins to eliminate remaining ethanol. Insert  
168 a spin column to new 1.5 ml collection tube, air dry for a while, then add 50  $\mu$ l RNase free water  
169 and maintain at room temperature for 1 mins, then centrifuge at  $8000 \times g$  for 1 min to elute  
170 RNA.

171 For RNA purification, all reagent and buffer should be treated by diethyl pyrocarbonate  
172 (DEPC) to eliminate RNase and also keep working area clean.



173

## 174 **Evaluation of purified nucleic acids**

175 DNA yield and quality were checked by 1 to 1.5 % agarose electrophoresis stained using  
176 Ethidium Bromide (EB), RNA integrity and quality were evaluated by 1 % MOPs-formaldehyde  
177 denaturing agarose electrophoresis with EB in RNA loading buffer [12]. Ethidium bromide  
178 stained DNA, or RNA fluorescent bands were visualized and recorded by Bio-Rad Gel Doc™  
179 XR+ gel image system (Bio-Rad Laboratories, Hercules, CA), or FOTODYNE system  
180 (FOTODYNE incorporated, Hartland, WI).

181 DNA and RNA quality and quantity were also estimated by Nanodrop 2000 UV spectrometer  
182 (Fisher Scientific, Waltham, MA). Also, DNA concentration was measured using Hoefer  
183 fluorometer DQ300 (Hoefer, Holiston, MA) with double DNA specific H33258 dye (Sigma-  
184 Aldrich).

185 Quantitative PCR (qPCR) and quantitative reverse transcription PCR (qRT-PCR) approaches  
186 were used to further precisely check whether the purified DNAs and RNAs contain  
187 contamination which could interfere with the efficiency of PCR reaction. In brief, 10 µl SYBR  
188 green-based qPCR reaction was prepared using Luna® Universal Probe qPCR Master Mix (New  
189 England Biolabs, Ipswich, MA, USA) with 0.5 µM primer set NtTublin\_1 for tobacco [13]. For  
190 DNA evaluation, we added 50 ng genomic DNA purified by different approaches in reaction. For  
191 RNA evaluation, cDNAs were reverse transcribed from 200 ng purified RNA in 10 µl reverse  
192 transcription reaction prepared using iScript™ cDNA Synthesis Kit (Bio-Rad), and cDNA  
193 amount to 2.5 ng RNA was added to the qRT-PCR reaction. Both qPCR and qRT-PCR were run  
194 on CFX96™ Real-Time System followed standard two step PCR program as suggested by

195 Luna® Universal Probe qPCR Master Mix manual. Amplification efficiencies of different input  
196 templates were evaluated using CFX Maestro™ Software version 1.1 (Bio-Rad) based on  
197 quantification cycle (Cq) value [14], which is calculated fractional cycle at which the target  
198 DNA amplicon associated fluorescent accumulated up to an arbitrary threshold.

199

## 200 **Results**

### 201 **Recharged used spin column and homemade spin column** 202 **using filter paper**

203 We previously described a method to prepare filter paper-based 96 well spin plates suitable for  
204 high throughput nucleic acid purification [8], and another recent publication also reported filter  
205 paper dipstick designed for fast purification of DNA and RNA used in PCR based applications  
206 that do not require large quantities of nucleic acids [9]. However, compared to the multiple well  
207 spin plate and dipstick, spin column assembled with filter paper should be the more appropriate  
208 format for low throughput nucleic purification conducted in most biological labs. Therefore, we  
209 have made attempts to prepare a filter paper based spin column.

210 Our efforts start from recharging of used commercial spin columns with filter paper disc(s). As  
211 described in the Methods section, such recharged spin column can be prepared based one a  
212 commercial spin column which has a flat bottom but equipped with net structure to support  
213 binding material, such as those Wizard® SV minicolumns of Promega (Madison, WI) (Fig 1A).  
214 Alternatively, a spin column with a conical bottom (V shape bottom) equipped drip opening,  
215 such as a miniprep column of Qiagen can be adopted. Both formats are convenient for reloading

216 of filter paper discs with a diameter of 5/16 inch (~8 mm). A recent version of a spin column  
217 named as a microspin column, such as those used in NEB kit can be recharged by using filter  
218 paper discs with a diameter of 5/16 inch or using filter paper disc(s) with a diameter of 3/16 inch  
219 (6.35mm).

220 Since filter paper is relatively physically stronger to hold its shape compare to the soft silica  
221 based membrane, such as glass fiber filter, therefore, we prefer to exclude fixing ring (O-ring)  
222 and support plastic frit adopted in many types of the commercial spin column in the recharging  
223 of these used spin column. The advantage of excluding these items is to simplify the recharging  
224 process, and also help to avoid the problem of solution leftover on the fixing ring during  
225 purification experiment.

226 In addition to the recharged used spin column, we also try to prepare homemade spin column  
227 assembled with filter paper. In the previous report, Borodina et al [15] have described a way to  
228 prepare glass fiber filter based homemade spin column using a 0.5 ml PCR tube. They added  
229 silica based glass fiber material to the bottom of the tube with several small holes punched,  
230 however, it is harder to push filter paper discs down to the bottom and seal the bottom of the tube  
231 properly like soft glass fiber filter adopted in the homemade silica spin column. For example, if  
232 we push filter paper too hard, then filter paper did fill the bottom of the tube but might be too  
233 tight to block flow through of solution. Otherwise, it might leave space and result in leaking of  
234 the sample solution.

235 After many attempts, we found that adding upper part of 10 ul tip as supporting ring in the  
236 tube, and then can load filter paper disc(s) on the supporting ring to form a simple homemade  
237 spin column. For better performance, we chose the upper part of the tip with additional edges  
238 (Fig 1B), which can provide enough supporting area to support filter paper disc and also leave

239 space between supporting ring and wall of the tube for allowing solution flow through filter discs  
240 without leftover.

241

## 242 **Evaluation of filter paper in the purification of different** 243 **nucleic acids**

244 Though filter paper has been successfully adopted in method using NaCl as a binding reagent [5,  
245 8, 9], we also found that filter paper work well in DNA purification followed protocol using  
246 guanidine-based reagent, which is commonly adopted in commercial kit for nucleic acid binding,  
247 and therefore, it is possible to use filter paper-based spin column as substitute for nucleic acid  
248 purification using commercial kit.

249 To investigate whether filter paper-based spin column can be used in commercial kit,, we  
250 reassembled spin columns of Qiagen kit by just replacing of original silicon membrane with filter  
251 paper discs, then apply such reassembled spin column in purification of different types of nucleic  
252 acids using respective Qiagen kits, including DNeasy<sup>®</sup> plant mini kit for plant genomic DNA,  
253 RNeasy<sup>®</sup> plant mini kit for plant total RNA, QIAquick PCR purification kit for PCR product,  
254 QIAquick gel extraction kit for DNA in agarose gel, and QIAprep spin miniprep kit for plasmid  
255 DNA. For comparison of effectiveness, we included original spin columns and reassembled spin  
256 column using glass fiber filters (Whatman<sup>™</sup> glass microfiber filters, Grade GF/F, GE), a silica  
257 based material usually adopted for recharging or preparing homemade spin column [10, 15].

258 In these experiments, the filter paper based-spin columns shown better performance for  
259 purification of tomato genomic DNA and yield higher amount final DNA than two silica-based  
260 spin column, including original Qiagen kit spin column and glass fiber-reassembled spin column,

261 (Fig 2A). Filter paper-based spin column was also functioned in purify plant total RNA (Fig 2B),  
262 DNA from PCR (Fig 2C) and recover DNA from agarose gel (Fig 2D), although the yields of  
263 final nucleic acid are relatively lower (half) compare to yield from experiments using silica-  
264 based spin columns.

265

266 **Fig 2. The efficiency of filter paper for purification of different types of nucleic acid using**  
267 **respective Qiagen kits.** (A) Tomato genomic DNAs purified using Qiagen DNeasy® plant mini  
268 kit. (B) Tomato total RNAs purified using Qiagen RNeasy® plant mini kit. (C) PCR products of  
269 GUS fragment purified Qiagen QIAquick PCR purification kit. (D) PCR products of GUS  
270 fragment recovered from agarose gel using a Qiagen QIAquick gel extraction kit. (E) pUC-19  
271 plasmid DNAs purified Qiagen QIAprep spin miniprep kit.

272

273 For each panel, lane from left to right labeled with original column, glass fiber and filter  
274 paper is the same volume of nucleic acid elution from purification experiments using  
275 original Qiagen spin column, reassembled spin column using two layers of Whatman™  
276 glass microfiber filters, (Grade GF/F), and reassembled spin column using two layers of  
277 Whatman™ qualitative filter paper, (Grade 3) respectively.

278

279 Apart from these finding, we also noticed that filter paper reassembled spin column does not  
280 work well for purification of plasmid DNA using QIAprep spin miniprep kit protocol since only  
281 a weak plasmid DNA band was detected by agarose gel electrophoresis (Fig 2E).

282 According to these results, it seems that filter paper works well for purifying long linear double  
283 strand nucleic acids, such as plant genomic DNA followed protocol for silica-based binding

284 material. On another hand, the filter paper was substantially less effective for supercoiled  
285 plasmid DNAs in the present experiments. Nevertheless, these experiments still indicated that  
286 filter paper could serve as an alternative binding material to replace silicon material for  
287 purification of many types of nucleic acids followed the protocols for silica-based material,  
288 except plasmid DNA using protocols developed for silica based nucleic binding material.

289

## 290 **Purification of nucleic acids using filter paper-based spin** 291 **column with commercial kit buffer or homemade buffer**

292 Since it was confirmed that filter paper-based spin column could apply in the purification of  
293 many types of nucleic acids followed the protocol of commercial kit originally optimized for the  
294 silica-based spin column, we expected that filter paper based spin column can use as a substitute  
295 of the commercial spin column in an experiment using the commercial kit buffer leftover to save  
296 resources. Also, filter paper-based spin column might also work for a homemade buffer which  
297 mimics commercial kit's for further reduce the expense in the laboratory. For instance, as to our  
298 interested plant nucleic acids, there are already several in-house protocols developed for  
299 purification using the silica based material for purification of plant DNA [10, 16-18] or plant  
300 RNA [11, 19]. Therefore, we have tried this idea using tobacco plant material.

301 Followed the protocol described in material and method, we have successfully purified tobacco  
302 genomic DNA using filter paper-based recharged or homemade spin column following protocol  
303 using Qiagen kit buffers and an in-house protocol modified from Lemke et al [10] using  
304 homemade buffers. As shown in Fig 3A, agarose gel electrophoresis can clearly show the similar  
305 performance of purification of tobacco genomic DNA using Qiagen original spin column; filter  
306 paper recharged spin column and filter paper based homemade spin column with a buffer of

307 Qiagen. The EB stain bands of genomic DNA band purified from the tobacco leaf by using either  
308 Qiagen original spin column, filter paper recharged spin column, and homemade spin column  
309 with Qiagen kit buffers are similar in size (integrity) and density (yield), i.e., the filter paper  
310 based spin column can be substitute of commercial silica based spin column in plant DNA  
311 purification using commercial kit buffer. On another hand, our results also indicated the higher  
312 yield of genomic DNAs purified from tobacco sample using homemade buffer compared to  
313 experiments using Qiagen kit buffer, especially for filter paper recharged spin column.

314

315 **Fig 3. Evaluation of purification of tobacco genomic DNA and total RNA using filter paper-**  
316 **based spin column with respective Qiagen kit buffer and homemade buffer.** (A) Agarose gel  
317 electrophoresis for 2.5  $\mu$ l tobacco genomic DNAs elution from purification experiments using  
318 Qiagen DNeasy<sup>®</sup> plant mini kit buffers with Qiagen original spin column (Lane Q/Q), filter  
319 paper recharged used spin column (Lane Q/R) and filter paper-based homemade spin column  
320 (Lane Q/H), followed by tobacco genomic DNAs purified using homemade buffer with Qiagen  
321 original spin column (Lane H/Q), filter paper recharged used spin column (Lane H/R) and filter  
322 paper-based homemade spin column (Lane H/H). The start material amount is 100 mg tobacco  
323 young leave tissue for experiments using a Qiagen spin column or filter paper recharged spin  
324 column, and 50 mg plant sample for homemade spin column purification. Final DNAs were  
325 eluted using 100  $\mu$ l elution buffer in these experiments. (B) Typical UV spectrum curve of  
326 tobacco DNAs purified using filter paper recharged spin column with Qiagen kit buffer (Q/R,  
327 blue curve) or homemade buffers (H/R, red curve) from the same amount leaf tissue. Y-axis is  
328 UV absorbance, and X-axis is wavelength (nm). (C) Amplification plots for three duplicated  
329 qPCR reactions contain 50 ng DNA purified using Qiagen kit (Q/Q, Blue curves) and three

330 qPCR reaction duplicates for 50 ng DNA purified from filter paper recharged spin column with  
331 homemade buffer (H/R, Red curves). The x-axis is PCR cycle numbers, Y-axis is level of SYBR  
332 fluorescence, and the green line is an arbitrary threshold to determine the C<sub>q</sub> value (the fractional  
333 cycle number at which amplification curve meet threshold level). (D) MOPS-formaldehyde  
334 denaturing agarose gel electrophoresis separated 5 µl RNA elution from purification experiment  
335 using Qiagen RNeasy<sup>®</sup> plant mini kit buffers with Qiagen original spin column (Lane Q/Q), filter  
336 paper recharged used spin column (Lane Q/R) and homemade buffer filter paper-based  
337 homemade spin column (Lane Q/H), followed tobacco total RNAs purified by using homemade  
338 buffer with Qiagen original spin column (Lane H/Q), filter paper recharged used spin column  
339 (Lane H/R) and filter paper-based homemade spin column (Lane H/H). The start material  
340 amount is 100 mg tobacco young leave in purification experiments using Qiagen spin column,  
341 and filter paper recharged used spin column, and 50 mg for homemade spin column purification.  
342 All these purifications used 50 µl elution buffer. (E) UV spectrum of tobacco total RNA  
343 purified using filter paper recharged spin column with Qiagen RNeasy<sup>®</sup> plant mini kit buffers  
344 (Q/R, blue curve) or homemade buffers (H/R, red curve). Y-axis is UV absorbance, and the X-  
345 axis is wavelength. (F) Amplification plots of three duplicated qRT-PCR reactions contain  
346 cDNA amounts to 2.5 ng RNA purified using Qiagen kit (Q/Q, Blue curves) and three duplicated  
347 qRT-PCR reactions with cDNA amounts to 2.5 ng RNA purified using filter paper recharged  
348 spin column with homemade buffer (H/R, Red curves).

349

350 UV spectrum meter analysis shown tobacco leaf DNA purified using filter paper-based  
351 recharged spin column with either Qiagen kit buffer or homemade buffer all shown standard  
352 DNA absorbance curve with the highest peak at 260 nm (Fig 3B).



353 To further check the quality of purified DNA, we adopted qPCR to see whether DNA purified  
354 by commercial kit and filter paper-based spin column with the homemade buffer can be  
355 amplified in the same efficiency. As shown in Fig 3C, amplifications of the same amount of  
356 DNAs purified by Qiagen kit and filter paper recharged spin column with homemade buffer  
357 shown the same amplification plots with nearly identical Cq value across the threshold. Based  
358 on assumption that PCR amplicon double their amount after each PCR cycle, there are no  
359 difference in PCR analysis for these DNAs (Fig 3C), and confirmed that DNA purified using the  
360 filter paper-based with homemade buffer approach is the same quality and has no additional  
361 inhibitor of PCR reaction as DNA purified using commercial kit.

362 DNA purified by using recharged and homemade spin column is more suitable for low  
363 throughput experiments, such as confirmation of transgenic plants via PCR. We also successfully  
364 use tomato and tobacco DNAs purified by homemade spin column with homemade buffer for  
365 molecular marker development experiments, including PCR based Cleaved Amplified  
366 Polymorphic Sequences (CAPS) or Kompetitive Allele Specific PCR (KASP) (unpublished  
367 data).

368 In addition to genomic DNA purification, we tested an in-house protocol and buffered  
369 described by Yaffe et al [11] for plant RNA purification. Our experiments confirmed that this  
370 protocol could be adopted for purification of tobacco plant RNA from leaf tissue using filter  
371 paper-based spin column as well. As shown in Fig 3B, the performance in the purification of  
372 tobacco total RNA using filter paper-based spin column with homemade buffers is similar to that  
373 of Qiagen Plant RNeasy mini kit. RNAs purified by filter paper recharged spin column with  
374 homemade buffer show the same pattern and density of EB stain rRNA bands as those purified  
375 by Qiagen kit, which indicated the purified RNAs have similar integrity and abundance (Fig 3D).

376 Analysis using UV spectrum meter shown standard RNA absorbance curve for tobacco leaf  
377 RNA purified using filter paper recharged spin column with Qiagen kit buffer or homemade  
378 buffer (Fig 3E). qRT-PCR analysis of RNAs purified by these different method also shown no  
379 noticeable difference as to the amplifications efficiencies between RNAs purified by Qiagen kit  
380 and RNA purified using filter paper bases spin column with homemade buffer, since Cq of these  
381 reactions are similar as indicated the cross point of their amplification curves with threshold (Fig  
382 3F). Such results suggested the same efficiency in both of reverse transcription or real time PCR  
383 reaction using RNAs purified by these different approaches. Therefore, filter paper based spin  
384 column can be adopted for plant RNA followed commercial kit protocol using kit buffer leftover  
385 to save resources, or using an in-house protocol with homemade buffer to further reduce the cost  
386 in the lab.

387 RNA purified by filter paper based spin column using a homemade buffer is ready to use for  
388 many downstream experiments, such as RT-PCR analysis of transgene expression in a transgenic  
389 plant, RACE for cDNA cloning, and even construction of mRNA deep sequencing libraries  
390 (unpublished data).

391

## 392 Discussion

393 Development of filter paper-based spin column would be useful for the utility of filter paper in  
394 nucleic acid purification since the spin column is a more adopted format which can operate using  
395 a conventional desktop centrifuge for low throughput bench-scale nucleic acid experiments  
396 required in daily practices of the biology lab. Here we found either recharged or homemade filter  
397 paper-based spin columns are suitable for such an application, and they can incorporate with  
398 commercial kits or in-house protocol by replacing expensive commercial spin column. The

399 apparent advantage of such practice is to save on laboratory monetary resources. For instance,  
400 the price per commercial spin column usually ranges from \$0.3 to over \$1 on the market. In  
401 preparing recharged or homemade spin column with filter paper, the filter paper discs cost less  
402 than 1 cent per column, though plastic ware of homemade spin column is about \$0.1, all plastic  
403 wares can be reused by washing using bleach solution which costs very little. Of course, labor in  
404 spin column preparation should be considered, but the extra effort should be acceptable for low  
405 throughput applications, mainly followed the simplified recharging processes without adding  
406 plastic fixing ring and support frit which commonly adopted in many types of commercial spin  
407 column.

408 Another way to save lab resources is to take advantage of the extra buffer of commercial kit or  
409 using a less expensive homemade buffer. To use the extra buffer, some labs regenerated spin  
410 column after regeneration treatment, such as using MaxXBBond regeneration kit [11]. Here we  
411 used filter paper to recharge spin column which is easy to perform. Also, using homemade spin  
412 column based on 0.5 ml tube can start from reduced amount sample and buffer, and therefore,  
413 more efficient in using the commercial kit buffer leftover. Purified nucleic acid by this way still  
414 yield final nucleic acid at  $\mu\text{g}$  scale and is enough for many downstream applications. The less  
415 expensive homemade buffer would be another attractive choice for reducing the cost. The  
416 homemade buffer used in in-house protocol might result in higher yield than commercial kit, and  
417 also save more than 75% in total expense compared to commercial kit [10, 11, 16].

418 We found that filter paper has the weak binding ability to nucleic acids in lysate without  
419 adding a binding buffer in the protocol of Qiagen DNeasy or RNeasy plant kit. Therefore, we  
420 used filter paper spin column to filter cell debris instead of using QIAshredder spin column from  
421 Qiagen kit. This filtering step might reduce final yield about 10% based on experiments using

422 cleared lysate (data not shown), but it could help to increase the amount of cleared lysate for  
423 samples which is hard to get clean lysate by centrifugation only. The similar strategy can apply  
424 to filter cell debris of *E. coli* for quick plasmid DNA purification (data not shown) as well.

425 As a solid phase nucleic acid purification approach, the protocols adopted for filter paper-based  
426 spin column eliminate the usage of toxic solvent, such as chloroform or phenol, and is safe to  
427 conduct. Punching filter paper disc process is safe while punching and cutting silica-based glass  
428 fiber filter might release airborne glass fiber which is a potential hazard to operator [20]. Also,  
429 recycle used spin column by recharging help to reduce the releasing of plastic waste from the lab  
430 to the environment and therefore is environment-friendly.

431 Apart from these advantages, some issues should be cautious in the application of the filter  
432 paper recharged or homemade spin column. One is the centrifuge speed. For the recharged spin  
433 column with V shape bottom or homemade spin column based on 0.5 ml tube, they should be  
434 centrifuged at relatively lower speed when filling with a solution. We usually centrifuge them no  
435 more than  $8000 \times g$ . Otherwise, it might result in leaking of the solution which does not pass  
436 through the filter and in turn reduce the binding of nucleic acids. However, when centrifuge  
437 these spin column without a solution, such as at the step of drying filter, it would be OK to  
438 centrifuge at full speed of microcentrifuge ( $>16000 \times g$ ). As to spin using a spin column with the  
439 net structure at the bottom to support filter discs (Fig 1A), those spin columns can be centrifuged  
440 as the full speed of micro centrifuge all the time. However, in steps of binding plant genomic  
441 DNA or RNA, we still prefer relative lower speed, such as no more than  $8000 \times g$  during binding  
442 and washing step, except the last drying filter paper step, which needs full speed to eliminate  
443 residue ethanol.

444 In the purification of plant DNA, we found that the final DNA elution might contain RNA if  
445 samples contain high abundant RNA or use less RNase in lysis buffer. DNA with RNA can  
446 result in additional low molecular smear visualized in agarose gel electrophoresis, and an also  
447 higher ratio of absorbance at 280/260 in UV spectrometer measurement due to higher 280 value.  
448 Although DNA with RNA might not affect PCR, it might lead to overestimated DNA  
449 concentration in calculation based on UV absorbance value at 280 nm. In case of this, we  
450 recommend reducing the amount of sample, such as using 50 mg per purification experiment or  
451 extend the time of lysis. We do not recommend increase RNase amount since the cost of RNase  
452 is the major portion of total expense in purification using a homemade buffer. For instance, 4ul  
453 RNase from Qiagen will cost more than 30 cents based on marker price. We sometimes use a  
454 reduced amount of RNase in plant genomic DNA purification with longer time of incubation or  
455 spin longer time at centrifuge. Purified DNA can also be quantified by approaches other than UV  
456 spectrometer for accurate concentration for experiments sensitive to DNA input amount. For  
457 tobacco, we usually use fluorometer and an H33258 dye-based assay to quantify tobacco  
458 genomic DNA for PCR based molecular marker analysis [21]. DNA quantification based on UV  
459 absorbance at 280 nm might not be consistent for DNA purified from different plant species  
460 using different commercial kits [22].

461 As for RNA purification, DNA contamination needs to be considered [23]. Though we found  
462 that filter paper-based spin column did accommodate with in-column DNA digestion protocol as  
463 suggested by Qiagen kit manual, we still suggest treating RNA elution using DNase-free™ kit  
464 (Invitrogen) or similar kits to eliminate remaining DNA. This step is important for DNA  
465 contamination sensitive experiments, such as qRT-PCR for quantifying of low expressed genes.  
466 On another hand, if the abundance of detected transcript sequence is much higher than that of the

467 background of DNA, such as in detection of pathogen transcript [9, 19], the DNA treatment  
468 might be ignored for reducing the cost if no reverse transcription control could verify the  
469 situation. In experiments like a Rapid amplification of cDNA ends (RACE), which is a PCR  
470 using one gene-specific primer combined with one arbitrary primer anneal to sequence of polyT  
471 adaptor or 5' adaptor added to cDNA, contaminated DNA in RNA might not be a big issue  
472 because DNA cannot be amplified in the PCR with only one gene specific primer, and no  
473 additional DNase treatment step also helps to eliminate the worry of reducing RNA integrity  
474 which is important for RACE like experiments.

475 At last, the successfully nucleic acid purification using filter paper mainly relies on cellulose,  
476 the major component of filter paper. Cellulose seems has the similar feature as silica-based  
477 material to bind nucleic acids in chaotropic condition, but only secondary fibril-associated  
478 cellulose found in filter paper was found able to isolate a wide range of nucleic acids, another  
479 type of cellulose with smooth surfaces was found is less efficient in recover DNA from solution  
480 [5]. On another hand, we found that the cellulose-based filter paper is more efficient in the  
481 purification of high molecular weight genomic DNA, which is in consistent with similar  
482 phenomenon reported for Promage's Paramagnetic cellulose. DNA purified using this  
483 commercial format of cellulose product shown much better performance in plant genomic DNA  
484 purification [6]. In addition, we found that filter paper is less efficient for plasmid DNA  
485 purification followed miniprep protocol. These phenomena suggested that cellulose based  
486 material does not exactly followed the same mechanism as silica-based material in binding and  
487 elution process for nucleic acids. Unlike silica-based nucleic acids purification process which has  
488 been extensively studied [24], less report associated with interaction between cellulose and

489 nucleic acids [9], and therefore, more studies are needed to facilitate application of the filter  
490 paper-based nucleic acid purification.

491

## 492 **Conclusions**

493 We found that filter paper can replace silicon material for purification of many types of nucleic  
494 acids. Filter paper can be easily adopted in the form of recharged used spin column or homemade  
495 spin column for low throughput application using commercial kit buffer leftover or homemade  
496 buffers to reduce the cost, therefore, can be an important component for nucleic acid purification  
497 in molecular biology laboratories.

498

## 499 **Acknowledgments**

500 We are thankful to Ann Piotrowski for help in planting the plants in the greenhouse and field.

501

## 502 **Reference**

- 503 1. Tan SC, Yiap BC DNA, RNA, and protein extraction: The past and the present. *J Biomed*  
504 *Biotechnol.* 2009; 574398. doi: 10.1155/2009/574398. doi: 10.1155/2009/574398 PMID:  
505 20011662
- 506 2. Thatcher SA. (2015) DNA/RNA preparation for molecular detection. *Clinical chemistry.*  
507 2015; 61:89-99. doi: 10.1373/clinchem.2014.221374 PMID: 25451869
- 508 3. McCormick RM. A solid-phase extraction procedure for DNA purification. *Anal Biochem.*  
509 1989; 181(1):66–74. PMID: 2554759

- 510 4. Boom R, Sol CJA, Salimans MMM, Jansen CL, Wertheimvandillen PME, Vandernoordaa J.  
511 Rapid and simple method for purification of nucleic acids. *J Clin Microbiol.* 1990;  
512 28(3):495-503. PMID: 1691208
- 513 5. Su X, Comeau AM. Cellulose as a matrix for nucleic acid purification. *Anal Biochem.* 1999;  
514 267:415–8. doi: 10.1006/abio.1998.2987 PMID: 10036150
- 515 6. Moeller JR, Moehn NR, Waller DM, Givnish TJ. Paramagnetic cellulose DNA isolation  
516 improves DNA yield and quality among diverse plant taxa. *Applications in Plant Sciences.*  
517 2014; 2(10): 1400048 doi: 10.3732/apps.1400048 PMID: 25309836
- 518 7. Vanhuynh N, Motte JC, Pilette JF, Declaire M, Colson C. Sequential elution of denatured  
519 proteins, hydrolyzed RNA, and plasmid DNA of bacterial lysates adsorbed onto stacked  
520 DEAE-cellulose membranes. *Anal Biochem.* 1993; 211(1): 61-5. PMID: 7686721
- 521 8. Shi R, Panthee DR. A novel plant DNA extraction method using filter paper-based 96-well  
522 spin plate. *Planta.* 2017; 246(3):579-584. doi: 10.1007/s00425-017-2743-3 PMID: 28707084
- 523 9. Zou Y, Michael MG, Wang Y, Wee E, Turni C, Blackall PJ, Trau M, Botella JR. Nucleic  
524 acid purification from plants, animals and microbes in under 30 seconds. *PLoS Biology.*  
525 2017; 15(11):e2003916. doi: 10.1371/journal.pbio.2003916 PMID: 29161268
- 526 10. Lemke L, Rex M, Zyprian E, Töpfer R. A simple, inexpensive and environmentally friendly  
527 method for high throughput DNA extraction from grapevine (*Vitis* spp.). *VITIS-Journal of*  
528 *Grapevine Research.* 2011; 50(1):7–10.
- 529 11. Yaffe H, Buxdorf K, Shapira I, Ein-Gedi S, Zvi MM, Fridman E, Moshelion M, Levy M.  
530 LogSpin: a simple, economical and fast method for RNA isolation from infected or healthy  
531 plants and other eukaryotic tissues. *BMC research notes.* 2012; 5(1): 45. doi: 10.1186/1756-  
532 0500-5-45 PMID: 22260178



- 533 12. Shi R, Sun YH, Zhang XH, Chiang VL. Poly (T) Adaptor RT-PCR. In Next-Generation  
534 MicroRNA Expression Profiling Technology. Humana Press; 2012; 53-66. doi: 10.1007/978-  
535 1-61779-427-8\_4 PMID: 22144191
- 536 13. Głowacka K, Kromdijk J, Leonelli L, Niyogi KK, Clemente TE, Long SP. An evaluation of  
537 new and established methods to determine T-DNA copy number and homozygosity in  
538 transgenic plants. *Plant, cell & environment*. 2016; 39(4):908-17. doi: 10.1111/pce.12693  
539 PMID: 26670088
- 540 14. Lefever S, Hellemans J, Pattyn F, Przybylski DR, Taylor C, Geurts R, Untergasser A,  
541 Vandesompele J, RDML consortium. RDML: structured language and reporting guidelines  
542 for real-time quantitative PCR data. *Nucleic acids research*. 2009; 37(7):2065-9. doi:  
543 10.1093/nar/gkp056 PMID: 19223324
- 544 15. Borodina TA, Lehrach H, Soldatov AV. DNA purification on homemade silica spin-  
545 columns. *Analytical biochemistry*. 2003; 321(1):135-7. PMID: 12963065
- 546 16. Ivanova NV, Fazekas AJ, Hebert PD. Semi-automated, membrane-based protocol for DNA  
547 isolation from plants. *Plant Molecular Biology Reporter*. 2008; 26(3):186. doi  
548 10.1007/s11105-008-0029-4
- 549 17. Li JF, Li L, Sheen J. Protocol: a rapid and economical procedure for purification of plasmid  
550 or plant DNA with diverse applications in plant biology. *Plant Methods*. 2010; 6(1):1. doi:  
551 10.1186/1746-4811-6-1 PMID: 20180960
- 552 18. Takakura, K. I., & Nishio, T. (2012). Safer DNA extraction from plant tissues using sucrose  
553 buffer and glass fiber filter. *Journal of plant research*, 125(6), 805-7. doi: 10.1007/s10265-  
554 012-0502-x PMID: 22695723

- 555 19. Yang F, Wang G, Xu W, Hong N. A rapid silica spin column-based method of RNA  
556 extraction from fruit trees for RT-PCR detection of viruses. *Journal of virological methods*.  
557 2017; 247:61-7. doi: 10.1016/j.jviromet.2017.05.020 PMID: 28583858
- 558 20. National Institute for Occupational Safety and Health: Fibrous Glass Dust.  
559 <https://www.cdc.gov/niosh/npg/npgd0288.html>
- 560 21. Drake K, Lewis RS. An introgressed *Nicotiana rustica* genomic region confers resistance to  
561 *Phytophthora nicotianae* in cultivated tobacco. *Crop Science*. 2013; 53(4):1366-74. doi:  
562 10.2135/cropsci2012.10.0605
- 563 22. Li X, Wu Y, Zhang L, Cao Y, Li Y, Li J, Zhu L, Wu G. Comparison of three common DNA  
564 concentration measurement methods. *Analytical biochemistry*. 2014; 451:18-24. doi:  
565 10.1016/j.ab.2014.01.016 PMID: 24495734
- 566 23. Bustin SA. Quantification of mRNA using real-time reverse transcription PCR (RT-PCR):  
567 trends and problems. *Journal of molecular endocrinology*. 2002; 29(1):23-39. PMID:  
568 12200227
- 569 24. Rimola A, Costa D, Sodupe M, Lambert JF, Ugliengo P. Silica surface features and their role  
570 in the adsorption of biomolecules: computational modeling and experiments. *Chemical*  
571 *reviews*. 2013; 113(6):4216-313. doi: 10.1021/cr3003054 PMID: 23289428

**A**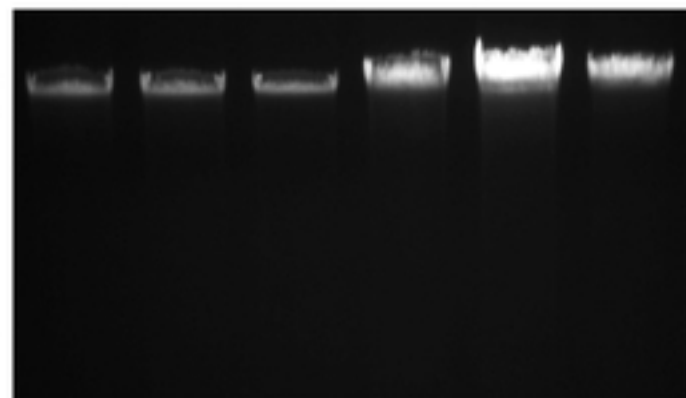

Q/Q   Q/R   Q/H   H/Q   H/R   H/H

**B**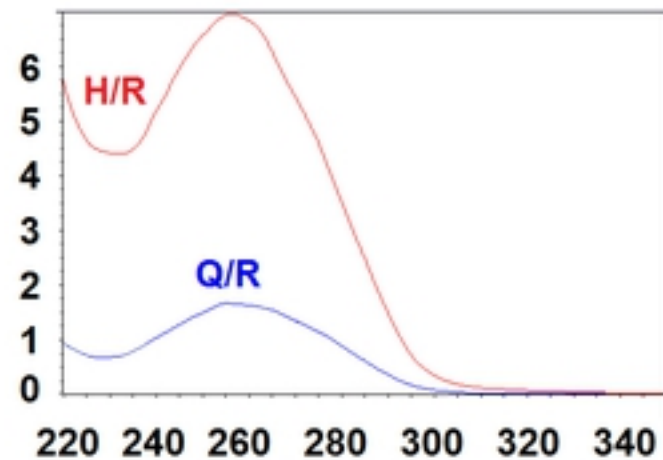**C**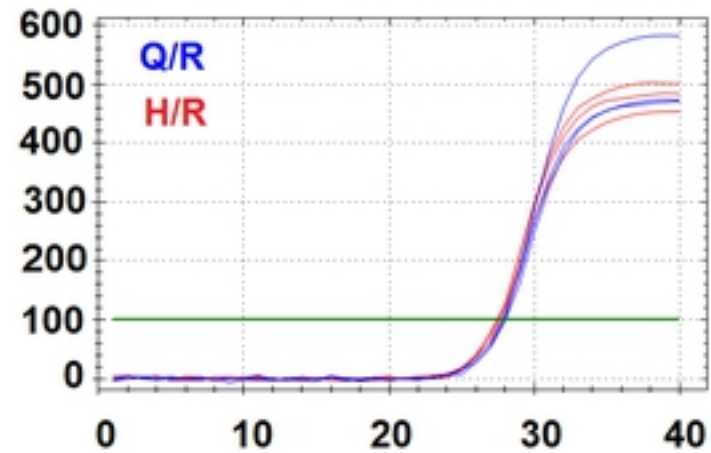**D**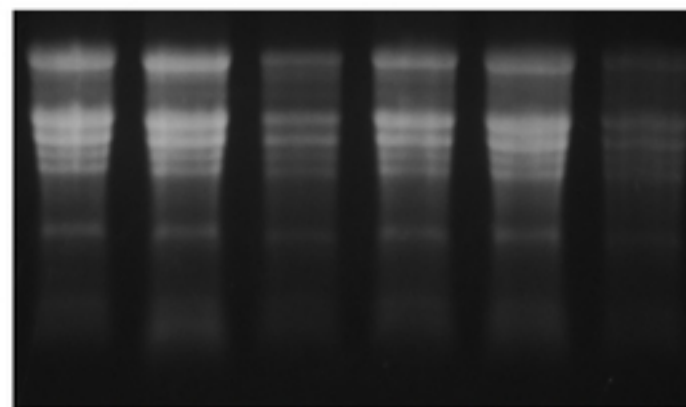

Q/Q   Q/R   Q/H   H/Q   H/R   H/H

**E**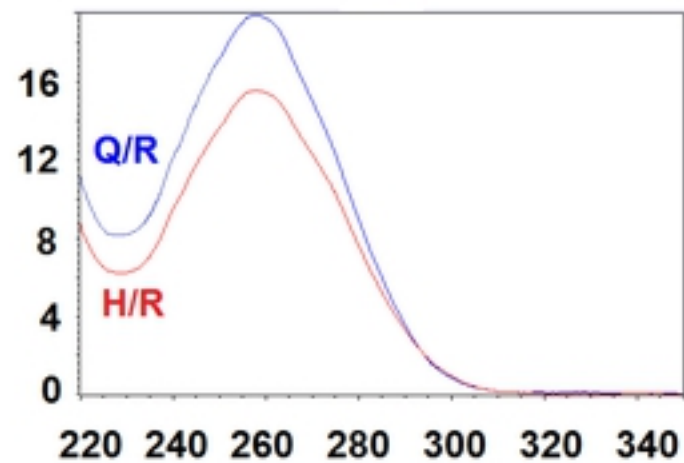**F**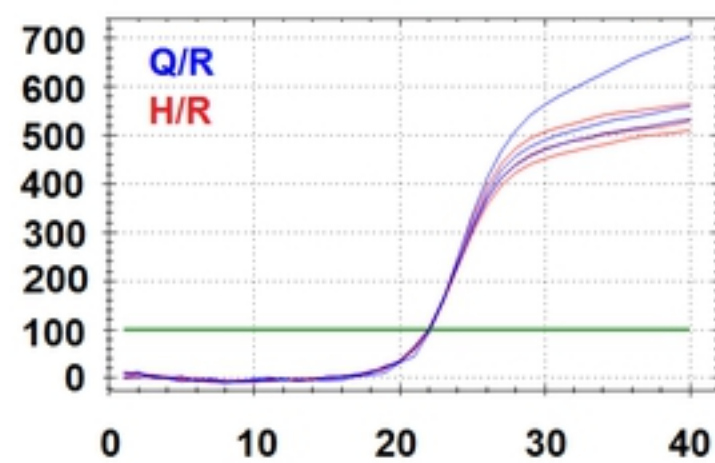

**A**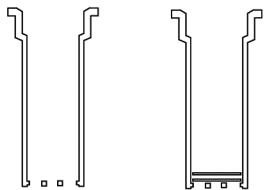**B**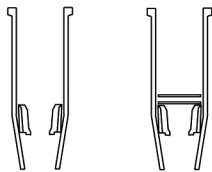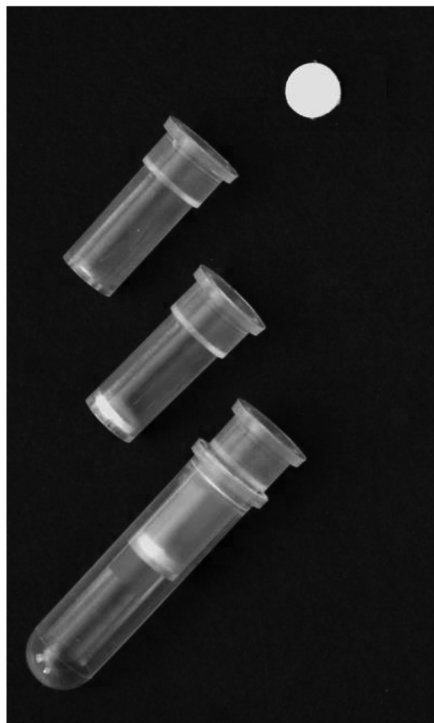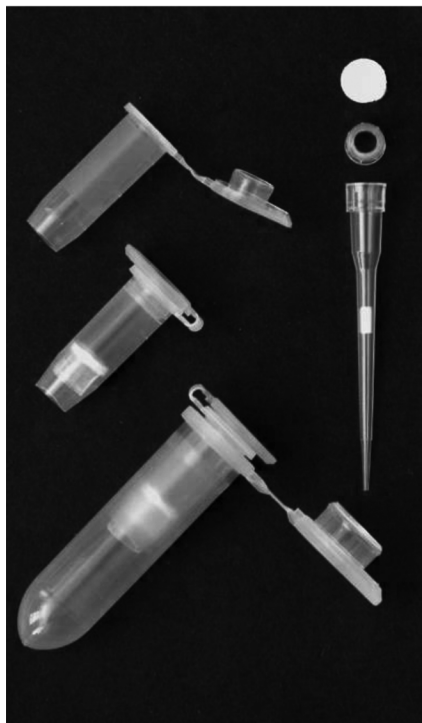

# A

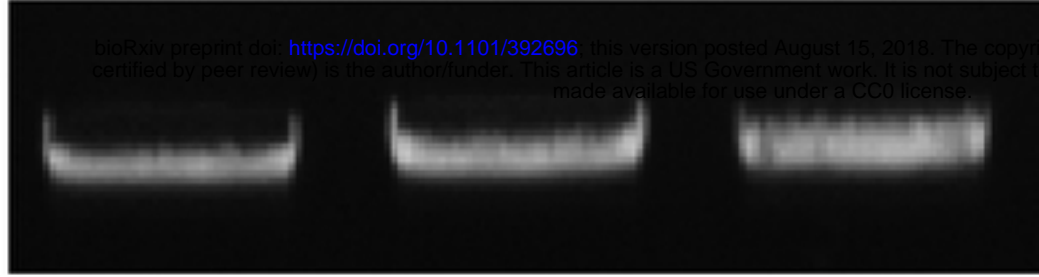

# C

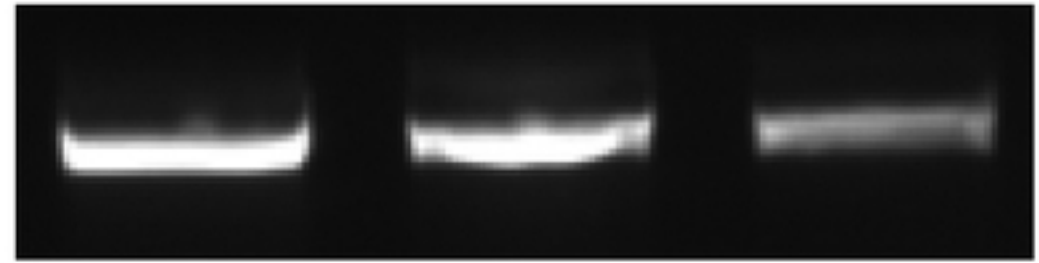

# D

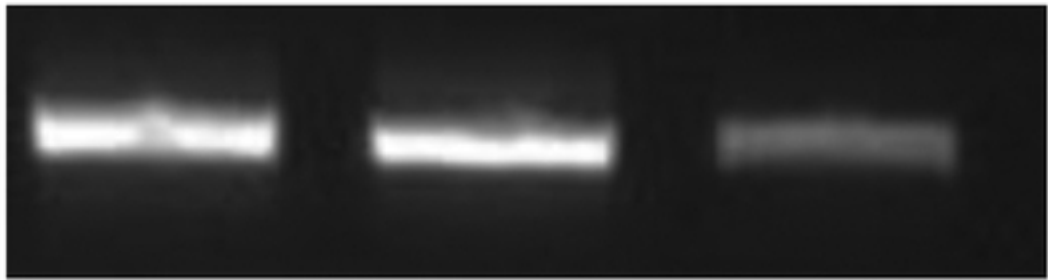

# E

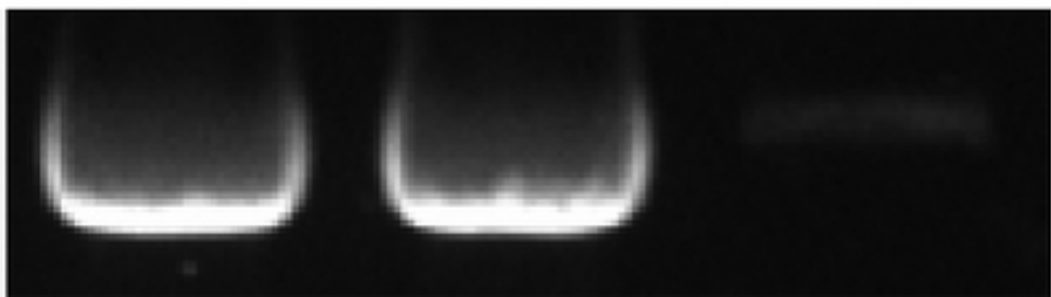

# B

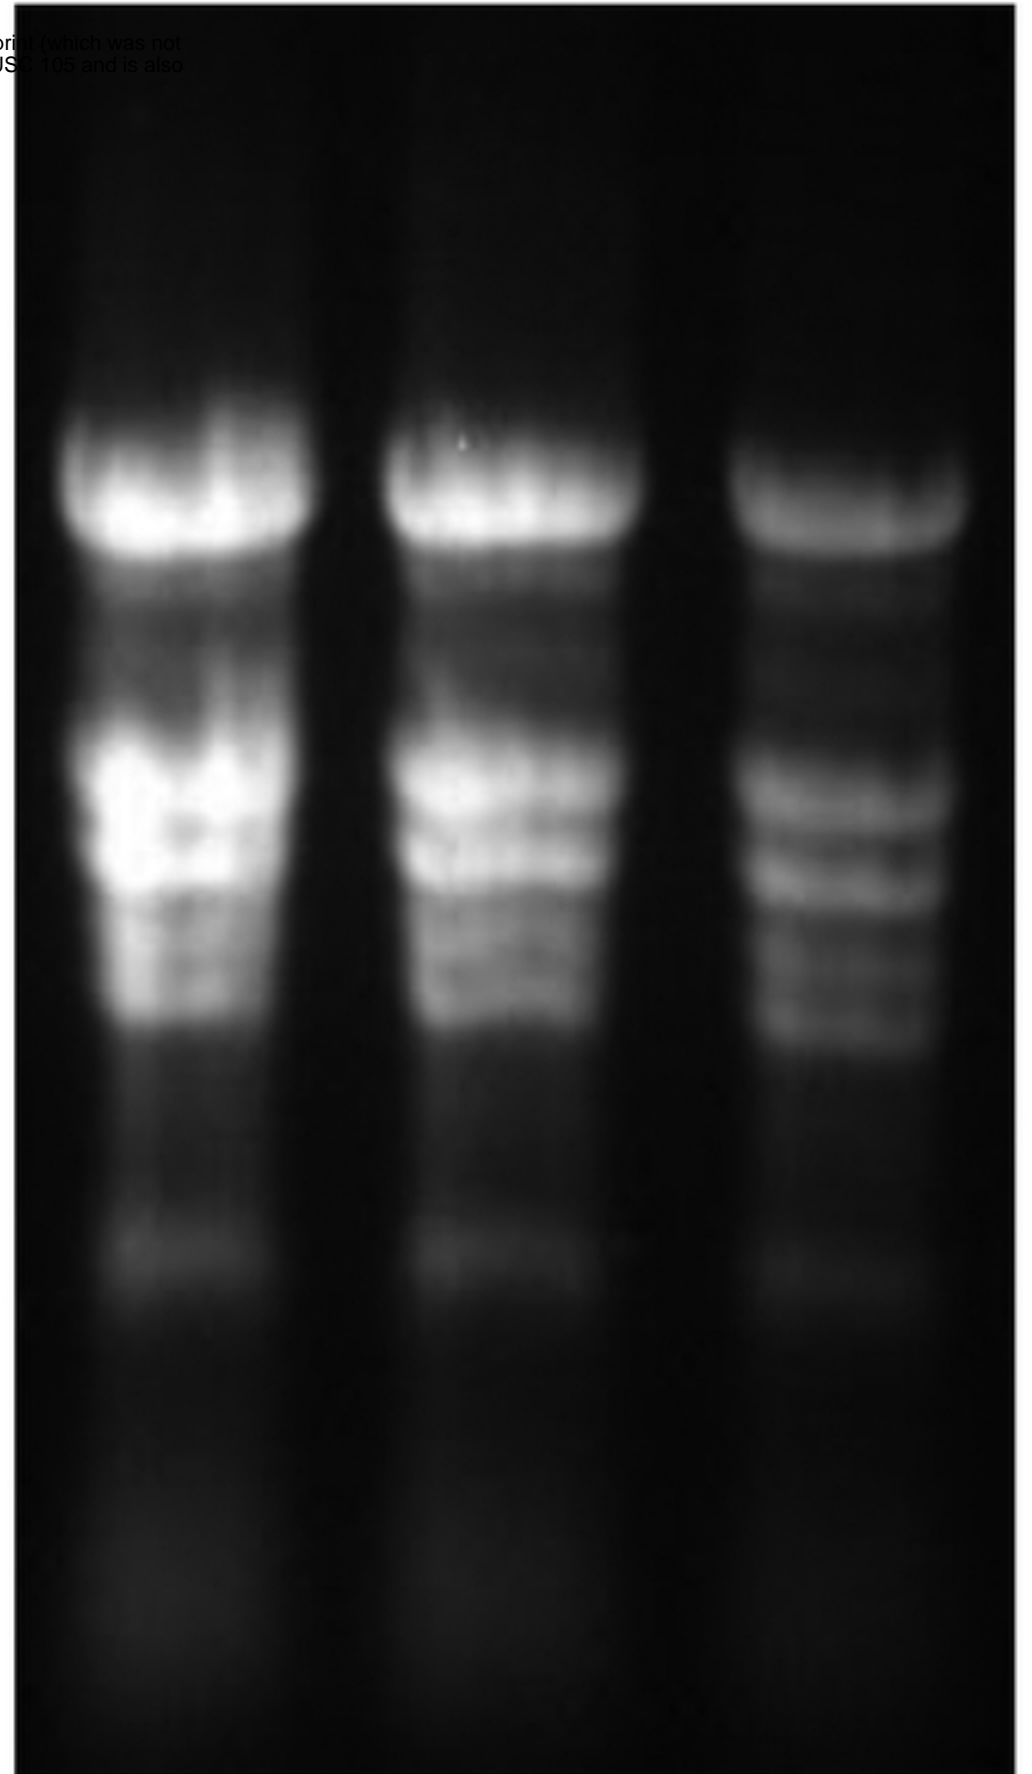

Source: https://www.biorxiv.org/content/10.1101/392696v1.full.pdf
